# Supplementary material for: 2D ultrathin CoP modified MnxCd1−xS with controllable band structure and robust photocatalytic performance for hydrogen generation
Source: Royal Society of Chemistry journal article supplement (doi:10.1039/c9dt02849h), 2019-01-01
Supplement: c9dt02849h1.pdf [file c9dt02849h1.pdf]

# **2D ultrathin CoP modified $\text{Mn}_x\text{Cd}_{1-x}\text{S}$ with controllable band structure and robust photocatalytic performance for hydrogen generation**

**Ran Chen, Yanhui Ao\*, Chao Wang, Peifang Wang**

Key Laboratory of Integrated Regulation and Resource Development on Shallow Lakes, Ministry of Education, College of Environment, Hohai University, No.1, Xikang road, Nanjing, 210098, China

## **Characterization**

X-ray diffraction (XRD) characterization was employed to analyze catalyst structure by a Shimadzu/XD-3A diffractometer system. Copper  $K\alpha$  radiation ( $\lambda = 1.5418 \text{ \AA}$ ) was used. Morphologies of the catalysts were employed through transmission electron microscopy (TEM) by using an JEOL 2100 system **and SEM by using Hitachi S-4800**. UV-vis diffuse reflectance spectra (DRS) was used by a Shimadzu/UV-3600 equipment. Photoluminescence (PL) analysis was adopted to explore the electrons transfer via a Hitachi/F-7000 apparatus. X-ray photoelectron spectra (XPS) was carried out by using PHI 5000 Versaprobe with  $\text{Al-K}\alpha$  radiation.

## **Photoelectrochemical (PEC) measurements**

The synthesized catalysts was tested in 0.5M  $\text{H}_2\text{SO}_4$  using a typical three electrode setup on an electrochemical station (Chenhua Instruments, CHI660D) with a  $\text{Ag}/\text{AgCl}$  reference electrode, a graphite rod or Pt foil as counter electrode and  $\text{CdS}$  composites as working electrode to study the electrochemical property. All potential data are

---

\* Corresponding author. E-mail address: [andyao@hhu.edu.cn](mailto:andyao@hhu.edu.cn) (Yanhui Ao)

given versus reversible hydrogen electrode (RHE) according to the following equation:

$E_{\text{RHE}} = E_{\text{Ag/AgCl}} + 0.197 + 0.059 \times \text{pH (V)}$ . The electrochemical impedance spectroscopy (EIS) and photocurrent were conducted under the irradiation of visible light by a 300 W xenon lamp.

### **Photocatalytic H<sub>2</sub> generation measurements**

Photocatalytic performance of the prepared catalysts were explored in a 150 ml quartz reactor. Typically, 5 mg samples were added in 50 ml solution. 0.25 M Na<sub>2</sub>S and 0.35 M Na<sub>2</sub>SO<sub>3</sub> were also used as sacrificial reagents. Next, evacuated the whole system for half an hour to keep the system vacuum. After that, turn on the xenon lamp with a 420 nm cut-off filter (CELHXF300, Beijing China Education Au-light Co., Ltd) to start the reaction. At last, the produced H<sub>2</sub> was determined by an online gas chromatogram (GC 7900) equipped with a TCD.

**The apparent quantum efficiency (AQE) of hydrogen generation was calculated as follows:**

$$\begin{aligned} \text{AQE} &= \frac{\text{Number of reacted electrons}}{\text{Number of incident photons}} \times 100\% \\ &= \frac{2 \times \text{Number of evolved H}_2 \text{ molecules}}{\text{Number of incident photons}} \times 100\% \end{aligned}$$

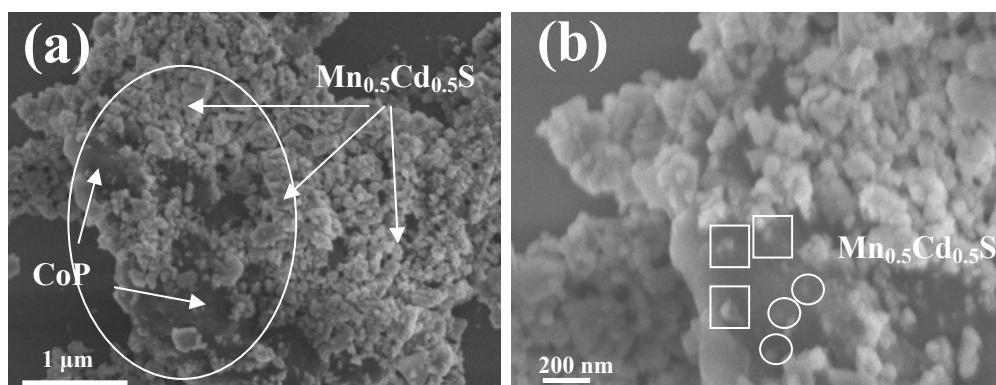

Figure S1. Low and high magnification of SEM images of MCSCP-4% sample

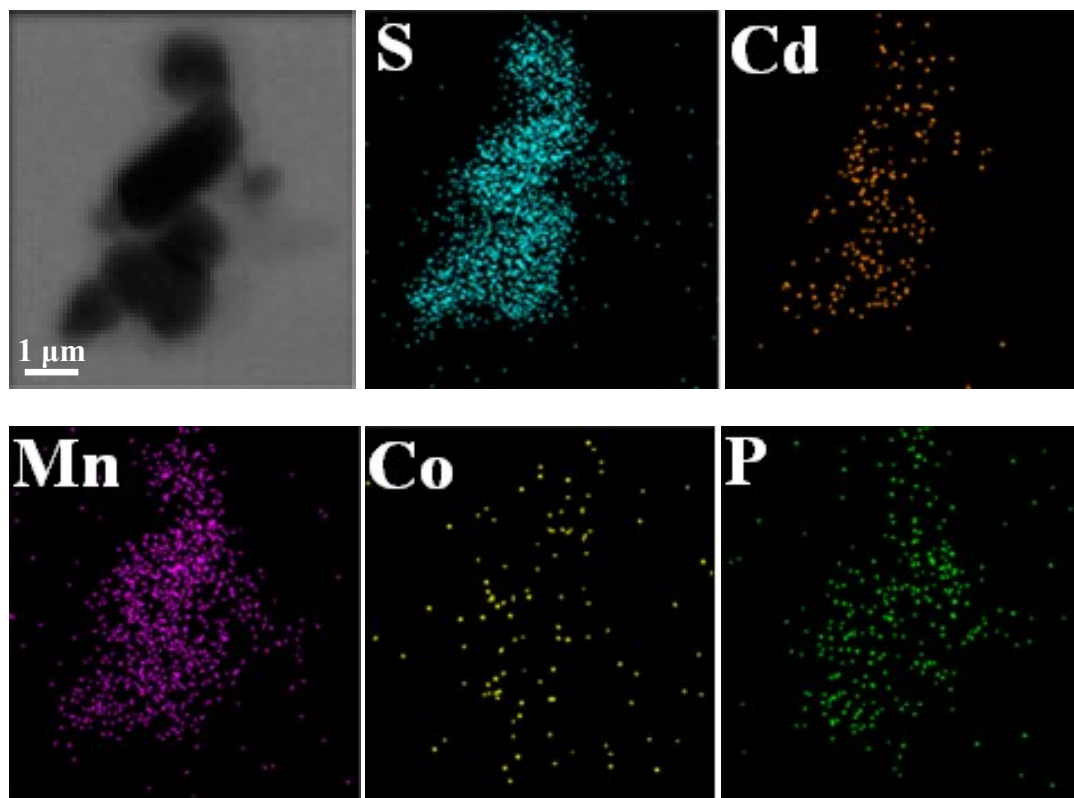

Figure S2. TEM image and EDX analysis of select area in MCSCP-4% sample

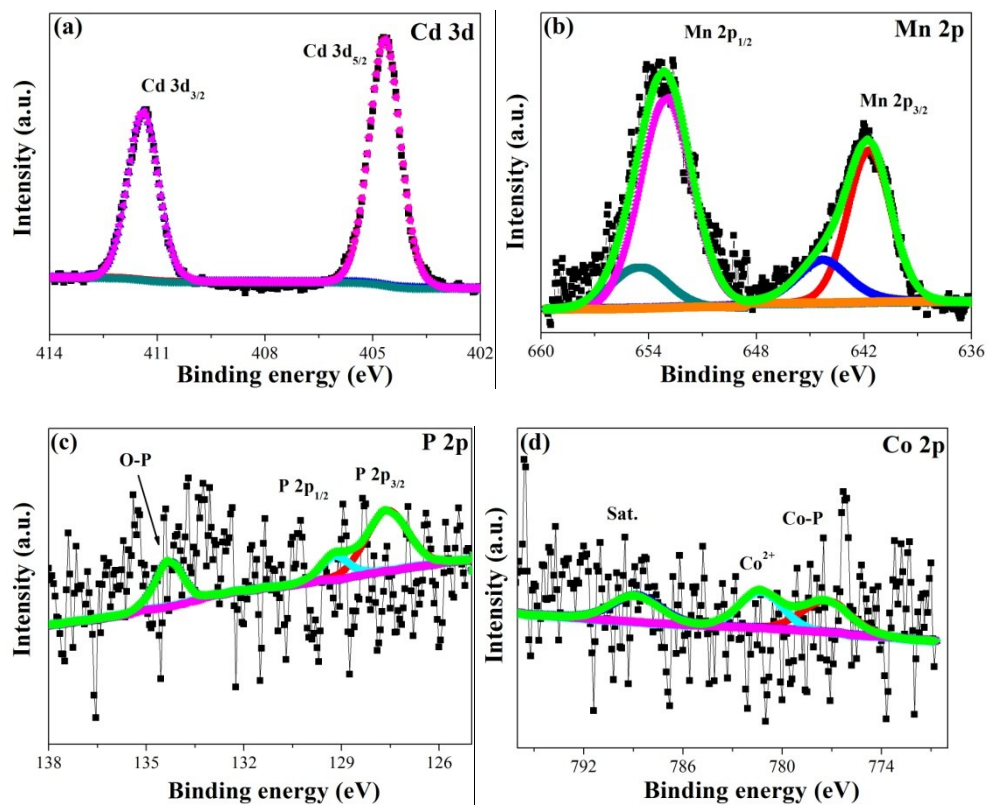

Figure S3. X-ray photoelectron spectra (XPS) of MCSCP-4% photocatalysts after reaction, high-resolution signals of Cd 3d(a); Mn 2p(b); P 2p(c); Co 2p(d)

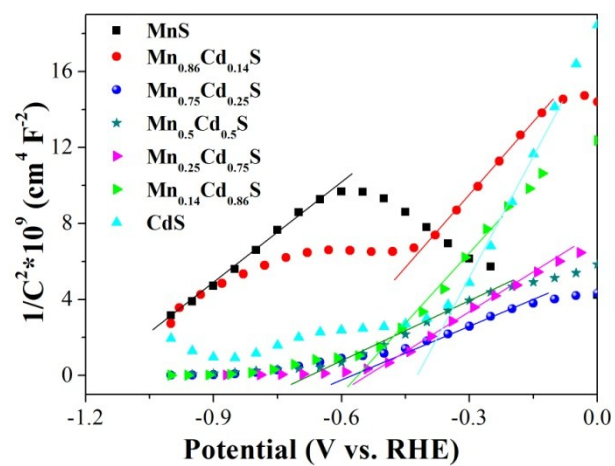

Figure S4. Mott-schottky characterization of CdS, MnS and a series of  $\text{Mn}_x\text{Cd}_{1-x}\text{S}$  photocatalysts.

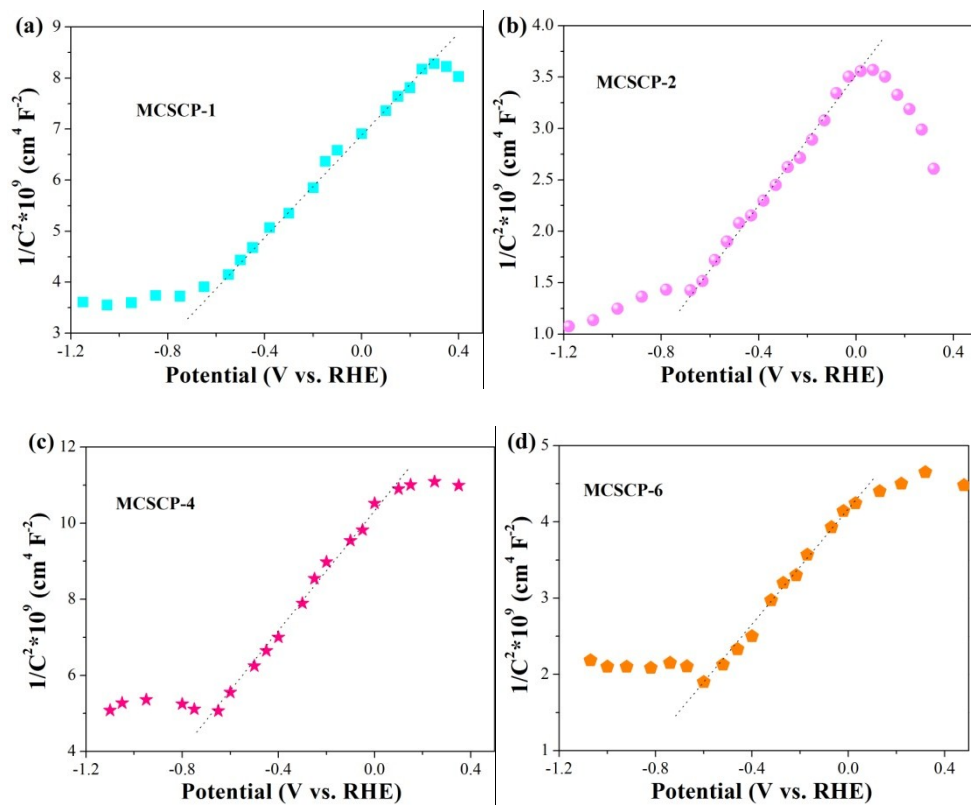

Figure S5. Mott-schottky characterization of  $\text{Mn}_{0.5}\text{Cd}_{0.5}\text{S}$  with different CoP content modifying.

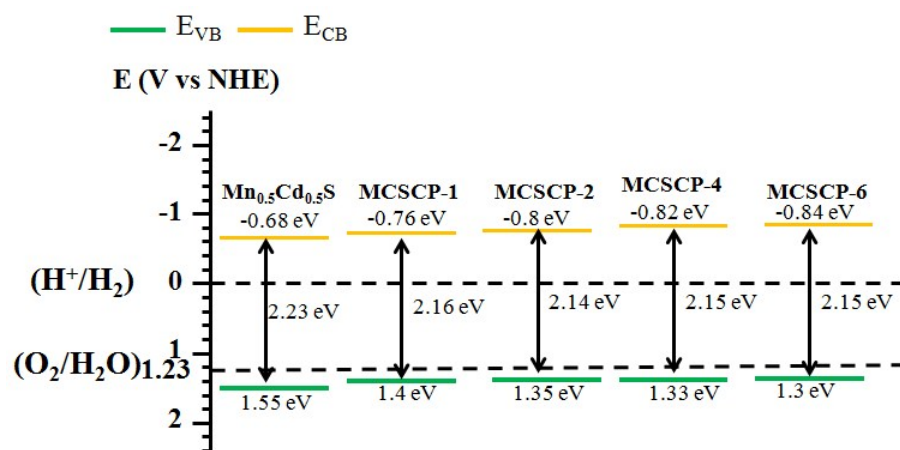

Figure S6. Energy band structure schematic of  $Mn_{0.5}Cd_{0.5}S$  with different CoP content modifying.
